1 **Natural aphrodisiacs consumption by male workers in the former Katanga province,**  
2 **DR Congo**

3 Paul Musa Obadia<sup>1,2</sup>, Gaylord Kalenda Mulaji<sup>3</sup>, Taty Muta Musambo<sup>1</sup>, Joseph Pyana  
4 Kitenge<sup>1</sup>, Trésor Carsi Kuhangana<sup>1,4,5</sup>, Tony Kayembe-Kitenge<sup>1,3</sup>, Célestin Banza Lubaba  
5 Nkulu<sup>1</sup>, Benoit Nemery<sup>2</sup>, Paul Enzlin<sup>6</sup>

6

7 *1. Unité de Toxicologie et Environnement, Ecole de santé publique, Faculté de médecine,*  
8 *Université de Lubumbashi, Lubumbashi, DR Congo*

9 *2. KU Leuven, Department of Public Health and Primary Care, Centre for Environment and*  
10 *Health, Leuven, Belgium*

11 *3. Institut Supérieur des Techniques Médicales Lubumbashi (ISTM)*

12 *4. Université de Kolwezi, Kolwezi, DR Congo*

13 *5. Division of Soil and Water Management, Faculty of Bioscience engineering, KU Leuven,*  
14 *Leuven, Belgium*

15 *6. Institute for Family and Sexuality Studies, Department of Neurosciences, KU Leuven,*  
16 *Leuven, Belgium*

17

18

19

20 **Corresponding Author:** [musa.p.obadia@gmail.com](mailto:musa.p.obadia@gmail.com)

21

22

23 **Abstract**

24 **Background**

25 In a previous cross-sectional study to determine the prevalence and determinants of erectile  
26 dysfunction (ED) among artisanal mineworkers, we found a significant association between  
27 ED and consumption of locally produced plant-derived aphrodisiacs.

28 **Aim**

29 We aimed to investigate the type and mode of consumption of aphrodisiacs, their possible  
30 health effects, and reasons for use among male workers in the Katanga province.

31 **Methods**

32 We conducted a mixed method study, first doing a survey (March 2021) among a convenience  
33 sample of 127 artisanal miners and 122 collective taxi-drivers. Participants responded to the  
34 International Index of Erectile Function (IIEF) questionnaire and had measurements of serum  
35 urea, creatinine, hepatic enzymes, total cholesterol, high-density lipoprotein (HDL), low-  
36 density lipoprotein (LDL), triglycerides and sexual hormones. In a second qualitative phase,  
37 16 participants, i.e., eight miners and eight drivers were interviewed.

38 **Results**

39 Self-reported regular (at least once a week) consumption of aphrodisiacs was significantly  
40 more prevalent among taxi-drivers (75%) than among miners (47%). Mild-to-moderate and  
41 moderate ED were reported more frequently by aphrodisiacs consumers [20/152 (13%)] than  
42 non-consumers [6/97 (6%)]. Five types of plant-derived aphrodisiacs (*Zingiber officinale*,  
43 *Mitragyna stipulosa*, *Ocimum* sp, *Piper nigrum*, *Securidaca longepedunculata*) were  
44 consumed, via the oral or anal routes, sometimes together with alcohol. We found no evidence  
45 of nephrotoxicity, hepatotoxicity or disturbances in serum levels of sex hormones. Themes  
46 that emerged from interviews related to cultural perceptions about masculinity, with miners  
47 using aphrodisiacs to support failing erectile function, and taxi-drivers taking aphrodisiacs for  
48 preventing ED.

49 **Conclusion**

50 We found a high prevalence of plant-derived aphrodisiacs use among working men in  
51 Katanga. While no serious adverse effects were identified, more ethno-botanical studies with

52 isolation and rigorous identification of active constituents are needed to provide the poor  
53 population with correct information and to protect them against possible unwanted toxic  
54 effects.

55

56 **Keywords:** Global health, sexual health, Natural aphrodisiacs, DR Congo

57

**58 Introduction**

59 For centuries and throughout the world, men have felt the need to take products to support  
60 erectile function [1]. Many plants or animals are known or believed to contain compounds  
61 capable of enhancing erectile function. Such natural products to improve erectile function are  
62 called “aphrodisiacs” in reference to Aphrodite, the Greek goddess of love and beauty.  
63 Aphrodisiacs can be categorized into three types according to their mode of action: i.e., libido  
64 increasing, sexual pleasure increasing, and potency increasing [2,3].

65 In spite of the availability of pharmacologically approved drugs to treat erectile dysfunction  
66 (ED), i.e., the phosphodiesterase type 5 (PDE5) inhibitors sildenafil, tadalafil, vardenafil, and  
67 avanafil [4], aphrodisiac plants remain widely used in Africa, where herbal-based treatments  
68 play an important role in the treatment and management of communicable and non-  
69 communicable diseases [5]. In most African communities, medicinal plants are regarded as  
70 accessible, affordable, and acceptable [5]. This is in line with a recent report from the World  
71 Health Organization (WHO) stating that more than 80% of the population in Africa still  
72 continue to rely on traditional medicines for their primary health care [6]. Similarly, a recent  
73 study of perceptions and use of traditional African medicine in Lubumbashi [Democratic  
74 Republic of Congo (DRC)], showed that 80% of participants reported using traditional  
75 medicines, which was defined as herbal-based treatments [7]. Studies conducted in Kinshasa  
76 [8] and in Lubumbashi [9] reported a large number of plants that are used to treat ED and  
77 prescribed mostly by less educated traditional healers.

78 In a previous cross-sectional study to determine the prevalence of ED among artisanal  
79 mineworkers, we found a significant association between aphrodisiacs consumption and  
80 erectile dysfunction [10]. Here, we report on a mixed methods follow-up study investigating  
81 the use of aphrodisiacs by male workers in Katanga. In a first phase, consisting of a cross-  
82 sectional survey among mineworkers and taxi drivers, we used questionnaires to assess  
83 erectile function and the prevalence of taking aphrodisiacs, as well as their types, origin and  
84 modes of use; we also measured sex hormones and markers of liver or kidney damage in  
85 serum. This was followed by a second qualitative phase in which we used interviews to  
86 explore the reasons why these men used aphrodisiacs.

87

## 88 2. Methods

89 We conducted a mixed methods study [11,12] using an explanatory sequential design in  
90 which a quantitative phase (survey) was followed by a qualitative phase (interviews).

### 91 **Phase I. Quantitative survey**

92 In a cross-sectional survey (23/03/2021 - 28/05/2021), we included, by convenience sampling at  
93 their workplace, 127 artisanal miners working in three copper-cobalt mines (Kamilombe,  
94 Tshabula and UCK) in Kolwezi, and 122 drivers of collective taxis (minibuses, called  
95 “matatu” in East Africa) based in Lubumbashi but sometimes working on the Lubumbashi–  
96 Kolwezi line. Miners included in the present study were different from our previous study on  
97 the prevalence of ED [10] but they belong to the same groups as those included in a study on  
98 hypoxemia during underground work [13].

99 As described in our previous survey [10], we used a questionnaire to obtain sociodemographic  
100 and other relevant characteristics including age (sometimes only an approximate date of  
101 birth), marital status, number of children, age of the last child, extra conjugal partner, current  
102 and past residence, occupation, lifestyle (tobacco smoking, alcohol consumption, drug use),  
103 current or chronic illnesses (diabetes, hypertension), use of medication, including PDE5  
104 inhibitors, and current consumption of local aphrodisiacs (at least once a week). To assess  
105 male sexual function, we used a Swahili version [10] of the International Index of Erectile  
106 Function (IIEF) questionnaire, which provides scores for five domains (erectile function,  
107 orgasmic function, sexual desire, satisfaction with intercourse, and general satisfaction) and a  
108 total score of male sexual function [14]. The IIEF has been shown to have good psychometric  
109 quality, and the internal consistency in the current sample was excellent (Cronbach’s alpha =  
110 0.95) [15]. ED was defined as a score for erectile function (IIEF-EF) <25, with the following  
111 degrees of severity: mild ED (score 19-24), mild-to-moderate (score 13-18), moderate (score  
112 7-12) and severe (score <7).

113 The paper questionnaires were generally self-administered, but for participants with low  
114 literacy face-to-face assistance was sometimes needed. Reportedly consumed aphrodisiac  
115 plants were later identified from their vernacular name by botanists from the *Institut National*  
116 *d’Etudes et Recherches Agronomiques* (INERA) KIPOPO in Lubumbashi.

117 While the participant was seated, blood pressure was measured using an Omron M3 HEM-  
118 7131-IntelliSense Blood Pressure Monitor. Height and weight were measured with a rod and a  
119 SECA scale, respectively. The body mass index (BMI) also was calculated.

120 At the end of the interview, in participants consenting with blood sampling, blood was drawn  
121 from a brachial vein between 7 AM and 11 AM (after thorough cleaning and disinfection of  
122 the skin with alcohol) into a 5 mL BD Vacutainer with spray-coated SSTTM II Advance  
123 (Becton Dickinson REF 369032) to obtain serum. Urea, creatinine, sGOT, sGPT, total  
124 cholesterol, HDL, LDL, triglyceride were measured using the CYANSmart Semi-Automatic  
125 Biochemistry Analyser CYPRESS DIAGNOSTICS (Hulshout, Belgium). Serum  
126 concentrations of testosterone, Sex Hormone Binding Globulin (SHBG) and Luteinizing  
127 Hormone (LH) were measured, as previously [13], by competitive immunoassay using  
128 ECLIA technology on a COBAS e801 instrument (Roche Diagnostics). Free testosterone was  
129 calculated with the Vermeulen formula [16].

### 130 **Statistical analysis**

131 Statistical analyses were conducted using SPSS (IBM SPSS Statistics for Windows, Version  
132 26.0.Armonk, NY) and Prism 10.2 (GraphPad Software, San Diego, CA 9210, USA) for  
133 graphical illustration. Statistical significance was defined as a two-tailed p-value  $\leq 0.05$ .  
134 Distribution of quantitative data was tested with the Shapiro-Wilk test. Normally distributed  
135 data are presented as means with their standard deviation (SD). Non-parametric data are  
136 reported as medians with their interquartile range (IQR). Differences between groups were  
137 assessed for statistical significance by Student's t-test, Mann Whitney U-test or Kruskal-  
138 Wallis test, as appropriate, and for proportions by the Fisher's Exact Test. Logistic regression  
139 will be used to check the association between aphrodisiacs consumption and blood tests, and  
140 socio demographic parameters.

141

### 142 **Phase II: Qualitative phase: One-to-one Interviews**

143 After completion of the survey, we interviewed some participants to explore the reasons why  
144 they took aphrodisiacs. Based on purposive sampling, we invited eight taxi-drivers and eight  
145 miners who had declared using currently local aphrodisiac products. After obtaining informed  
146 consent, the same person (PMO) conducted one-to-one interviews in Swahili at a time and  
147 place convenient to the participants. Interviews lasted for about 10 minutes and were audio-  
148 recorded, with field notes taken simultaneously. Sufficient prompts were utilized to obtain in-  
149 depth information, for additional clarification and to avoid being deviated from the topic.  
150 Debriefing was done at the end of each interview. The interview was transcribed (by PMO).  
151 The final report was rechecked and given back to the participants to confirm its accuracy.  
152 Transcripts of audio-taped interviews were translated into French, and analysed by a single

153 person (PMO) using thematic analysis [17]. In the results section, quotes are attributed to  
154 individual respondents, designated as M for miners and T for taxi-drivers + respondent  
155 number. The IDs mentioned after each quote are only known by the interviewer (PMO).

### 156 **Ethical aspects**

157 The study protocol was approved by the Committee for medical Ethics of the Université de  
158 Lubumbashi (UNILU). Approval number: UNILU/CEM /144 /2018. All respondents included  
159 in the study signed a written consent form.

## 160 **3. Results**

### 161 **3.1. General characteristics**

162 Table 1 presents sociodemographic and other relevant characteristics of the 249 participants,  
163 i.e., 127 miners and 122 taxi-drivers. The two groups had a similar mean age. No participant  
164 reported a history of diabetes or hypertension. More taxi-drivers than miners reported  
165 drinking alcohol, smoking tobacco and using aphrodisiacs. Self-reported aphrodisiacs  
166 consumption at least once a week was 1.6-fold more prevalent among taxi-drivers (75%)  
167 compared to miners (47%). Obesity was infrequent (3%), but more prevalent among taxi  
168 drivers. High blood pressure (systolic pressure  $\geq 140$  mmHg or diastolic pressure  $\geq 90$  mmHg)  
169 was present in 16% taxi-drivers and in 3% of miners.

170 With regards to sexual function as assessed by the IIEF, questionnaire-defined ED (IIEF-EF  
171 score  $< 25$ ) was more prevalent among taxi drivers (55%) than among artisanal miners (34%).  
172 This was mainly due to a higher prevalence of mild ED (IIEF score 19–24) among taxi  
173 drivers, because the proportions of men with mild-to-moderate ED were similar in both  
174 groups. Only one man (a taxi-driver) had a score below 12 suggestive of moderate ED, and  
175 none of the participants had severe ED (score  $< 7$ ). The proportion of regular consumers of  
176 aphrodisiacs was higher among taxi-drivers (75%) than miners (47%).

177

178 **Table 1: Sociodemographic and other characteristics of participants**

| <b>Parameters</b>                                           | <b>All<br/>n= 249</b> | <b>Taxi-Drivers<br/>n = 122</b> | <b>Miners<br/>n = 127</b> | <b>P-value</b> |
|-------------------------------------------------------------|-----------------------|---------------------------------|---------------------------|----------------|
| Age (years)                                                 | 34.9 ± 8.4<br>[18–65] | 34.8 ± 6.7<br>[18–65]           | 32.0 ± 6.7<br>[18.7–44.1] | 0.46           |
| Height (cm)                                                 | 172 ± 7               | 172 ± 6                         | 168 ± 7                   | 0.25           |
| Weight (kg)                                                 | 68 ± 6                | 70 ± 9                          | 67 ± 11                   | 0.68           |
| Body Mass Index (kg/m <sup>2</sup> )                        | 23.2 ± 3.0            | 23.0 ± 3.3                      | 23.4 ± 2.6                | 0.11           |
| Underweight (BMI ≤18.4)                                     | 6 (2%)                | 2 (2%)                          | 4 (3%)                    | 0.07           |
| Normal weight (BMI 18.5–24.5)                               | 175 (70%)             | 90 (74%)                        | 85 (67%)                  |                |
| Overweight (BMI 24.6–29.9)                                  | 61 (25%)              | 24 (20%)                        | 37 (29%)                  |                |
| Obesity (BMI ≥30)                                           | 7 (3%)                | 6 (5%)                          | 1 (1%)                    |                |
| Work seniority (years)                                      | 11 ± 8                | 11 ± 6                          | 9 ± 4                     | 0.20           |
| Working hours (hours/day)                                   | 13 ± 2                | 15 ± 2                          | 12 ± 2                    | <0.001         |
| Tobacco smoking (N, %)                                      | 111 (45%)             | 63 (52%)                        | 48 (38%)                  | 0.03           |
| Alcohol consumption (N,%)                                   | 137 (55%)             | 84 (69%)                        | 53 (42%)                  | <0.001         |
| Alcohol+Tobacco (N, %)                                      | 98 (39%)              | 57 (47%)                        | 41 (32%)                  | 0.02           |
| <b>Arterial blood pressure</b>                              |                       |                                 |                           |                |
| Systolic (mm Hg)                                            | 125 ± 14              | 123.2 ± 18.8                    | 126.6 ± 6.7               | 0.07           |
| Diastolic (mm Hg)                                           | 84 ± 12               | 88.8 ± 12.9                     | 79.5 ± 8.5                | <0.001         |
| High blood pressure (N, %)                                  | 24 (10%)              | 20 (16%)                        | 4 (3%)                    | <0.001         |
| <b>Sexual function</b>                                      |                       |                                 |                           |                |
| IIEF Total score ≤60 (N, %)                                 | 113 (45%)             | 75 (61%)                        | 38 (30%)                  | 0.003          |
| IIEF-EF score <25 (N, %)                                    | 109 (44%)             | 67 (55%)                        | 42 (33%)                  | 0.001          |
| Mild ED (score 19–24) (N, %)                                | 83 (33%)              | 54 (44%)                        | 29 (23%)                  | 0.002          |
| Mild-to-Moderate or Moderate ED (score 7–18) (N, %)         | 26 (10%)              | 13 (11%)                        | 13 (10%)                  |                |
| Severe ED (score <7)                                        | 0 (0%)                | 0 (0%)                          | 0 (0%)                    |                |
| <b>Aphrodisiacs consumption at least once a week (N, %)</b> | 152 (61%)             | 92 (75%)                        | 60 (47%)                  | <0.001         |

179

180 *IIEF is the International Index of Erectile Function; EF is Erectile Function domain, with*  
 181 *IIEF-EF score <25 indicating presence of Erectile Dysfunction (ED), which can be*  
 182 *subdivided into different degrees of severity. Values reported are mean ±SD, or N (%) P value*  
 183 *by Student's t-test or by Fisher's exact test.*

184



185 Table 2 presents sociodemographic and other relevant characteristics of men according to the  
186 use of aphrodisiacs. The 152 regular consumers ( $36.6 \pm 8.6y$ ) were on average 4 years older  
187 than the 97 non-consumers ( $32.0 \pm 7.4y$ ); obesity was more prevalent among aphrodisiacs  
188 consumers. Reported alcohol drinking, tobacco smoking, and cannabis use were more  
189 prevalent among aphrodisiacs consumers than non-consumers. High blood pressure was  
190 measured in 15% of consumers and in 2% of non-consumers. The prevalence rates of any ED  
191 (IIEF score  $<25$ ) did not differ between regular users (41%) and non-users of aphrodisiacs  
192 (48%). However, mild-to-moderate or moderate ED was more prevalent among regular users  
193 (13%) than non-users (6%).

194

195 **Table 2: Characteristics of participants according to regular use of aphrodisiacs**

| <b>Parameters</b>                                   | <b>Regular consumers<br/>n = 152</b> | <b>Non-consumers<br/>n = 97</b> | <b>P-value</b> |
|-----------------------------------------------------|--------------------------------------|---------------------------------|----------------|
| Age (years)                                         | 36.6 ± 8.6<br>[19 – 65]              | 32.4 ± 7.4<br>[17.8 – 55]       | <0.001         |
| Height (cm)                                         | 172 ± 7                              | 171 ± 7                         | 0.1            |
| Weight (kg)                                         | 69 ± 11                              | 66 ± 11                         | 0.06           |
| Body Mass Index (kg/m <sup>2</sup> )                | 23.1 ± 3.2                           | 23.2 ± 2.7                      | 0.87           |
| Underweight (BMI ≤18.4)                             | 4 (3%)                               | 2 (2%)                          | 0.28           |
| Normal weight (BMI 18.5–24.5)                       | 110 (72%)                            | 65 (67%)                        |                |
| Overweight (BMI 24.6–29.9)                          | 32 (21%)                             | 29 (30%)                        |                |
| Obesity (BMI ≥30)                                   | 6 (4%)                               | 1 (1%)                          |                |
| Work seniority (years)                              | 12 ± 8                               | 9 ± 6                           | 0.01           |
| Working hours (hours/day)                           | 13 ± 3                               | 13 ± 2                          | 0.23           |
| Tobacco smoking (N, %)                              | 89 (59%)                             | 22 (23%)                        | <0.001         |
| Alcohol consumption (N, %)                          | 104 (68%)                            | 33 (34%)                        | <0.001         |
| Alcohol+Tobacco (N, %)                              | 78 (51%)                             | 20 (21%)                        | <0.001         |
| Cannabis                                            | 71 (47%)                             | 23 (24%)                        | <0.001         |
| <b>Arterial blood pressure</b>                      |                                      |                                 |                |
| Systolic (mm Hg)                                    | 125 ± 16                             | 124 ± 12                        | 0.49           |
| Diastolic (mm Hg)                                   | 87 ± 13                              | 80 ± 9                          | <0.001         |
| High blood pressure (N, %)                          | 22 (15%)                             | 2 (2%)                          | 0.001          |
| <b>Sexual function</b>                              |                                      |                                 |                |
| IIEF total score ≤60 (N, %)                         | 70 (46%)                             | 43 (44%)                        | 0.79           |
| IIEF-EF <25 (N, %)                                  | 62 (41%)                             | 47 (48%)                        | 0.24           |
| Mild ED (score 19–24)                               | 42 (28%)                             | 41 (42%)                        | 0.022          |
| Mild-to-Moderate or Moderate<br>(score 7–18) (N, %) | 20 (13%)                             | 6 (6%)                          |                |
| Severe ED (score <7)                                | 0 (0%)                               | 0 (0%)                          |                |

196

197 *IIEF is the International Index of Erectile Function; EF is Erectile Function domain, with*  
198 *IIEF-EF score <25 indicating presence of Erectile Dysfunction (ED), which can be*  
199 *subdivided into different degrees of severity. Values reported are mean ± SD or N (%); P*  
200 *value by Student's t-test or by Fisher's exact test.*

201

202 **3.2. Aphrodisiacs consumption**

203 As shown in Figure 1, traditional aphrodisiac products are easily available in the area.

204 Five plants were reportedly consumed as aphrodisiacs (Table 3, Figure 1): **A:** Tangawisi  
205 (*Zingiber officinale*), **B:** Mujilanga (*Mitragyna stipulosa*), **C:** Kafupa (*Ocimum sp*), **D:** Nketu  
206 (*Piper nigrum*), **E:** Mweyeye (*Securidaca longepedunculata*). Among our participants, these  
207 agents were either consumed orally or applied anally (Table 3). Seven participants among  
208 aphrodisiacs consumers declared combining PDE5i with aphrodisiac products.

209 **Figure 1: Traditional medicine products (including aphrodisiacs) as sold publicly in**  
210 **Lubumbashi down town.**

211

212

213

214 **Figure2. Traditional aphrodisiac products consumed by participants**

- 215 A. *Tangawisi* or ginger (*Zingiber officinale*) tubers (taken from the market), bottle with  
216 *tangawisi* decoction:
- 217 B. *Mujilanga* (*Mitragyna stipulosa*): dried barks, bottle with infusion obtained from local  
218 alcohol mixed with dried *Mujilanga* barks
- 219 C. *Kafupa* (*Ocimum Sp*) roots
- 220 D. *Nketu* seeds (*Piper nigrum*)
- 221 E. *Mweyeye* leaves, flowers and stem of *Securidaca longepedunculata*, (taken from a  
222 tree), bottle with infusion obtained from local alcohol with pounded bark of *S.*  
223 *longepedunculata*. (All photographs taken by PMO)

224

225 **Figure 3: Prevalence of aphrodisiacs consumption among 127 collective taxi-drivers and**  
 226 **122 miners**

227

228 *Proportion of men reporting consumption of five specific plant-based aphrodisiacs at least*  
 229 *once a week as assessed in a survey of 127 collective taxi-drivers and 122 miners.*

230 *Significantly more taxi-drivers than miners reported using aphrodisiacs, and the type of*  
 231 *products also differed between the groups (chi square test= 20.8,  $p < 0.001$ )*

232 Two consumed aphrodisiacs (*Securidaca longepedunculata* and *Mitragyna stipulosa*) were  
 233 taken with alcohol. The reported consumption of aphrodisiacs was 1.6-fold more prevalent  
 234 among taxi-drivers compared to miners (chi square test= 20.8,  $p < 0.001$ ), and the types of  
 235 aphrodisiacs used also differed between the two groups (Figure 3).

236 Of note, aphrodisiacs were also consumed by 54% of men without complaints of ED, whilst  
 237 36% of men with complaints of ED did not report taking aphrodisiacs.

238 **Table 3: Description of reported plant-derived aphrodisiacs**

| Vernacular name           | Scientific name                    | Family        | Parts used   | Mode of use                                | Route      | N        |
|---------------------------|------------------------------------|---------------|--------------|--------------------------------------------|------------|----------|
| A. Tangawisi              | <i>Zingiber officinale</i>         | Zingiberaceae | roots        | chewed, crushed, macerated, decoction      | oral, anal | 68 (27%) |
| B. Mujilanga              | <i>Mitragyna stipulosa</i>         | Rubiaceae     | bark         | decoction, infusion in alcohol or in water | oral       | 45 (18%) |
| C. Kafupa.                | <i>Ocimum</i> Sp                   | Lamiaceae     | roots        | chewed with peanuts                        | oral       | 17 (7%)  |
| D. Nketu                  | <i>Piper nigrum</i>                | Piperaceae    | seeds        | chewed, crushed                            | oral, anal | 12 (5%)  |
| E. Mweyeye (“plante vix”) | <i>Securidaca longepedunculata</i> | Polygalaceae  | roots, barks | decoction, infusion in water or in alcohol | oral       | 10 (4%)  |

239

240 *Five plant-derived products consumed as aphrodisiacs with their vernacular name, scientific*  
241 *name, family, and their mode and route of administration, ranked by order of frequency of use*  
242 *as reported by 249 participants.*

243

244

245 **3.3.Laboratory results**

246

247 No differences were found between aphrodisiac consumers and non-consumers regarding  
248 serum levels of total testosterone, free testosterone, SHBG, or LH (Table 4).

249 **Table 4: Hormones**

| Hormones                   | Regular consumers n = 137 | Non-consumers n = 72 | P-value |
|----------------------------|---------------------------|----------------------|---------|
| Total Testosterone (ng/dL) | 461 (367 – 593)           | 472 (320 – 577)      | 0.87    |
| Free Testosterone (ng/dL)  | 10 (8 – 13)               | 10 (8 – 13)          | 0.57    |
| SHBG (nmol/L)              | 31 (19 – 43)              | 32 (20 – 42)         | 0.50    |
| LH (IU/l)                  | 6 (5 – 8)                 | 6 (5 – 8)            | 0.95    |

250

251 *Values reported are medians with interquartile range (IQR). P-value by Mann Whitney U-test*

252 *SHBG: Sexual Hormone Binding Globulin*

253 *LH: Luteinizing Hormone*

254

255 Table 5 presents the biochemical parameters in blood of 137 aphrodisiac consumers and 72  
256 non-consumers. Overall, regular consumers exhibited similar or slightly *better* values for  
257 serum markers of hepatic or renal injury than non-consumers. However, total cholesterol,  
258 triglycerides, HDL and LDL were significantly higher among consumers than non-consumers.  
259 After adjusting for age, tobacco smoking, alcohol consumption, high blood pressure,  
260 overweight and obesity, aphrodisiacs consumption was significantly associated with LDL  
261 [adjusted odds ratio (aOR) 2.1 (95% confidence interval 1.1 – 3.8), P=0.01], and with total  
262 cholesterol [aOR 3.3 (1.6 – 6.8), P=0.001].

263 No specific aphrodisiac product stood out in a non-parametric analysis of variance (Kruskall-  
264 Wallis) with comparisons made between non-consumers and consumers of each of the five  
265 types of aphrodisiacs (Supplementary table 1).

266

267 **Table 5: Biochemistry results**

| <b>Biochemistry tests</b> | <b>Regular consumers n = 152</b> | <b>Non-consumers n = 97</b> | <b>P-value</b> |
|---------------------------|----------------------------------|-----------------------------|----------------|
| Urea (mg/dL)              | 26 (20 – 31)                     | 30 (22 – 34)                | 0.02           |
| Creatinine (mg/dL)        | 1.3 (1.1 – 1.4)                  | 1.4 (1.2 – 1.5)             | 0.01           |
| sGOT (IU/L)               | 20 (10 – 26)                     | 20 (10 – 30)                | 0.23           |
| sGPT (IU/L)               | 12 (8 – 18)                      | 14 (10 – 22)                | 0.04           |
| Total Cholesterol (mg/dL) | 187 (133 – 225)                  | 161 (11 – 197)              | 0.01           |
| Triglycerides (mg/dL)     | 48 (34 – 65)                     | 46 (30 – 62)                | 0.18           |
| HDL (mg/dL)               | 57 (35 – 64)                     | 41 (30 – 60)                | 0.09           |
| LDL (mg/dL)               | 109 (86 – 147)                   | 89 (72 – 125)               | 0.01           |

268

269 *Values reported are medians with interquartile range (IQR). P value by Mann Whitney U-test*

270



271 **3.4. Qualitative results**

272 All participants in the qualitative study were (by design) regular users of natural aphrodisiacs.  
273 The eight collective taxi-drivers included in the qualitative study were somewhat older ( $36\pm 6$   
274 y) than the eight artisanal miners included ( $34\pm 3$  y), but artisanal miners had been in their jobs  
275 longer ( $12\pm 4$  y) than the collective taxi-drivers ( $9\pm 4$  y). Both groups contained men with and  
276 without ED, as defined by the IIEF questionnaire; 5 taxi-drivers had mild ED (score 19 – 24)  
277 compared to 3 miners including 2 with mild ED (score 19 – 24) and 1 with moderate ED (7 –  
278 12).

279 In both groups, erectile dysfunction was described as a sign of loss of male identity.  
280 Participants considered erection as the main man's attribute.

281 *"I often take these aphrodisiac plants to always maintain "Nguvu" [sexual performance], to*  
282 *always remain the head of my house and always give orders to my wife. Otherwise if you*  
283 *become sexually weak, it is very bad for the home and you become unhappy"* (T3).

284 *"The value of a man is a good erection (...) we consume these plants because our job*  
285 *weakens us; without the consumption of these stimulants we will not be real men in our*  
286 *respective houses (...) you know, once you are able to satisfy sexually your wife, all other*  
287 *things do not have a value, even if you do not have a job"* (M1).

288

289 *"Doctor, I can tell you, if you start experiencing difficulties with erection your mother in law*  
290 *will be the first person to be told about it. (...) let me tell you the truth, when we meet during*  
291 *breaks we often talk about our sexual life, we have common issues (...). Our partners are*  
292 *complaining about a decrease in our sexual power"* (M2).

293

294 Miners were afraid of losing their relationship with their wives. Most of them believed that  
295 being a man implies the ability to maintain one's erection for penetrative sex, and to satisfy a  
296 woman, and that this is very crucial for a better consideration in the society.

297 *"I sometimes feel guilty when I can't satisfy my wife sexually (...) but, as you know, the hip is*  
298 *the pillar of the house. Otherwise if your hip no longer works well, you become a dead man*  
299 *and your home will be doomed or your wife will be at the mercy of whoever can satisfy her"*  
300 (M1).

301 Among miners, interviews revealed a wide belief that the arduous nature of their work  
302 combined with some toxic agents present in the mined minerals, affected their sexual health:

303 *“Doctor, if you are doing a hard work your anus will be permanently open and this condition*  
304 *can’t allow a man to have a better sexual life” (M2).*

305 Some were desperate as they lost confidence, they also believed that their relationships were  
306 already affected, and they thought, they were cheated by their partners.

307 *“Almost all our wives complain about our sexual performance. It is believable that those who*  
308 *are smart already have friends with whom they have fun” (M3).*

309 Repeated failed sexual activities due to erectile dysfunction were the main reason that led  
310 most miners to seek an ultimate solution to recover respect as a man. The best solution was to  
311 look for products that could allow them to satisfy their partners. These power products were  
312 first taken to experiment with having sex with an extra-marital partner to ensure that they  
313 would work.

314 Among taxi-drivers, the prolonged sitting position during their job and the chronic low back  
315 pain caused by shocks due to poor road conditions were believed to be risk factors that could  
316 lead to ED, which could be prevented by taking preventive measures.

317 *“Doctor, do you know that as we spend hours being seated, this can compress our anus along*  
318 *with “Mishipa” [vessels and nerves] that supply the penis (...). These factors are capable to*  
319 *affect our future sexual health (...) that is why we must maintain our backs and anus by taking*  
320 *power products after work to prevent any unwanted sexual issue” (T1).*

321 *“But when we take them regularly, we feel like the hip becomes more flexible. This is why we*  
322 *trust all these herbal teas that these women sellers bring us because they help us prevent the*  
323 *worst in our couples” (T2).*

324

#### 325 4. Discussion

326 This mixed methods study was prompted by our observations of a high prevalence of erectile  
327 dysfunction among mineworkers and its association with a high consumption of local  
328 aphrodisiacs [10]. In two large groups of male workers, i.e., artisanal miners and collective  
329 taxi-drivers, we assessed sexual function by means of a validated questionnaire, inquired  
330 about the types and patterns of use of aphrodisiacs, and explored their possible adverse effects  
331 on liver and kidney functions, and we then interviewed a subsample of participants to explore  
332 the main reasons for using aphrodisiac plants. To our knowledge, this is the first study of its  
333 kind in sub-Saharan Africa.

#### 334 General considerations

335 As in our previous study [10], we found a high prevalence of questionnaire-derived ED (IIEF-  
336 EF score < 25) among (relatively young) miners: 34% in the present study, among diggers  
337 from three artisanal mines in Kolwezi, and even 47% in our previous study, among  
338 mineworkers of similar age but recruited from a larger geographical area and a broader range  
339 of mining jobs. However, the prevalence of ED differed considerably between the controls of  
340 the present study (collective taxi-drivers) and those of the previous study (bakers): 55%  
341 *versus* 17%, respectively. The very high prevalence of reported ED and use of aphrodisiacs  
342 among the taxi-drivers, compared to miners, was unexpected and cannot be attributed to older  
343 age or other characteristics. We have no firm explanation for the differences in ED prevalence  
344 between our two control populations. In our previous survey [10], we had concluded from a  
345 mediation analysis that erectile dysfunction among miners was partly explained by poor  
346 quality of marital relationships, possibly due to long time spent working away from home.  
347 This was possibly also the case for our taxi-drivers, but we were not able to assess this aspect  
348 in the current study, in which we did not assess the quality of the partner relationship. It is  
349 also conceivable that responses, even to validated questionnaires, are heavily influenced by  
350 perceptions of sexual health and masculinity, which may substantially vary between groups of  
351 workers, even within categories with similar socio-economic status.

352 However, the aim of the present study was not so much to investigate the prevalence of ED in  
353 different occupational groups, but to focus on the use of aphrodisiacs. Interestingly, although  
354 ED (mild-to-moderate and moderate) was 2-fold more prevalent among consumers of  
355 aphrodisiacs than among non-consumers (Table 2), aphrodisiacs were also consumed by men

356 without complaints of ED, and not all men with complaints of ED reported taking  
357 aphrodisiacs.

358 As in many African cultures, aphrodisiac products are mostly made from plants and they are  
359 widely consumed in main cities of DR Congo. The overall prevalence of self-reported regular  
360 consumption of aphrodisiacs found in our study (61%) was somewhat higher than the 53%  
361 reported among men of the same age in Ghana [18]. This is consistent with a study in  
362 Kinshasa in which 59% of men aged from 35 to 49 years reported using aphrodisiacs [19].  
363 Also, the prevalence found in our study was 4-fold higher than that reported in another study  
364 from Ghana [20]. In our study population, aphrodisiacs could be purchased easily at their  
365 working places, including bus stops and mines. Moreover, advertisements for “power  
366 products” including energy drinks [21], possibly contribute to the high prevalence of  
367 aphrodisiacs consumption in our region. Aphrodisiacs were often consumed mixed with  
368 alcohol or together with alcoholic beverages, therewith corroborating a study from Ghana  
369 [18]. Our aphrodisiacs consumers often said that drinking alcoholic beverages improved the  
370 effect of aphrodisiac products. In small doses alcohol can improve erections and increase  
371 desire due to its anxiolytic effects [22]. However, chronic alcoholism may cause  
372 hypogonadism and neuropathy, both of which may interfere negatively with erectile function  
373 [23].

#### 374 **Properties of the aphrodisiacs consumed in southern Katanga**

375 Available studies on aphrodisiacs have identified different mechanisms through which they  
376 could act [1]. These mechanisms include NO and cGMP signalling, NOS expression, increase  
377 (LH, testosterone and FSH) or decrease (prolactin) in hormone levels, co-ordination of  
378 central, sympathetic and parasympathetic nervous system [3].

379 In general, scientifically valid information on these plants’ pharmacological properties and  
380 effects on sexual performance are limited, and virtually non-existent for humans. Results from  
381 a systematic review of medicinal plants used for sexual dysfunction in sub-Saharan Africa  
382 demonstrated that out of the 209 species that are used traditionally, only 48 were validated  
383 scientifically, while no information was found for the remaining 161 [24].

384 Some experimental studies undertaken in the field of herbal medicine have identified  
385 bioactive compounds responsible for erection or for libido in some of these plants, but the  
386 human relevance of these findings remains unknown, as well as their harm thresholds.

387 Here, we summarize the (limited) existing literature on the aphrodisiac plants reportedly used  
388 by the participants in this study.

389 A. Tangawisi (*Zingiber officinale*)

390 Ginger belongs to the Zingiberaceae family and is native to south-eastern Asia. It is widely  
391 used as a spice and or medicine in many countries in the world. This appeared to be the most  
392 frequently used aphrodisiac among our participants, who reportedly took it either orally or  
393 anally in different forms. The tuber could be chewed, crushed, macerated, or it could be taken  
394 as a decoction. The tuber is widely used to treat ED in DR Congo [8].

395 With regard to its sexual stimulant properties, only animal studies are available. In an  
396 experimental study in male rats, Riaz [25] reported an increase in sperm quality and a  
397 significant decrease in plasma testosterone and LH levels. However, in a study using oral  
398 gavage of ginger, Afzali and Ghalehkandi [26] reported an increase in semen testosterone  
399 levels in male rats in comparison to control rats. Banihani [27] suggested that ginger increases  
400 testosterone by enhancing the activity of antioxidant enzymes, normalizing blood glucose,  
401 increasing blood flow in the testes, increasing testicular weight, and recycling testosterone  
402 receptors.

403

404 B. Mujilanga (*Mitragyna stipulosa*)

405 Mujilanga belonging to the family Rubiaceae, is indigenous to Africa and is used in  
406 traditional medicine to heal various diseases. It is widely used by both men and women to  
407 treat gastrointestinal diseases. In men, it is used for sexual purposes, with either bark or roots  
408 of the plant being mixed with alcohol or water and then taken as an infusion or a decoction.

409 Experimental studies have reported trypanocidal [28], anti-inflammatory and cardiovascular  
410 activities [29], but clear and convincing literature about mechanisms related to sexual  
411 dysfunction treatment in animals or humans is not available.

412 C. Kafupa (*Ocimum* sp.)

413 Kafupa is a name given to various plants; here it seems that it was *Ocimum vanderystii*, a  
414 species of the family of Lamiaceae (basil) that is native of Congo, DR Congo, Zambia and  
415 Angola. In the Copperbelt region, the plant is indicative of a rich copper deposit [30].  
416 Consumers often chew roots with peanuts to enhance erectile function. No scientific  
417 information seems available about this plant's pharmacologic properties.

418

419

420 D. Nketu (*Piper nigrum*)

421 The pepper plant is a flowering vine in the family of Piperaceae, cultivated for its fruits (the  
422 peppercorn), which is usually dried and used as a spice and seasoning. Black pepper is the  
423 world's most traded spice and one of the most commonly used spices added to cuisines around  
424 the world. Ground, dried, and cooked peppercorns have been used since antiquity, both for  
425 flavour and as a traditional medicine, and these different uses were also reported by  
426 consumers in the present study. They described using pepper as an aphrodisiac through the  
427 anus or orally by chewing it.

428 An experimental study has suggested different mechanisms of action through which black  
429 pepper may enhance sexual function in men. First, piperine, one of its components, may  
430 enhance sexual function in men given its inhibitory effect on testosterone 5"-reductase  
431 resulting in higher testosterone levels [31]. Secondly, fatty acids in black pepper, i.e., auric  
432 acid, myristic acid and palmitic acid, affect the secretion and metabolism of androgens.  
433 Lastly, *Piper nigrum* is known to contain zinc that increases serum levels of sex hormones  
434 including testosterone.

435

436 E. Mweyeye (*Securidaca longepedunculata*)

437 Mweyeye is an herb belonging to the family of Polygalaceae ("violet tree"). Participants in  
438 the present study reported consuming this plant's bark after decoction or infusion in alcohol  
439 or simply water for about 48 hours. According to local sellers, "*the powder from pounded*  
440 *barks of the plant can be applied on the root and the body of the penis 45 minutes to one hour*  
441 *before intercourse to improve one's erection. Mweyeye's powder is widely sold in Zambia,*  
442 *South Africa, and in almost the entire eastern part of Africa under the name 'Congo dust' or*  
443 *[in Swahili] 'Vumbi la Congo' (...)*".

444 Chloroform extracts of the root bark of this plant have been shown in vitro to induce  
445 relaxation of corpus cavernosum smooth muscle, almost as effectively as sildenafil [32].

446 In conclusion, although these natural plant-derived aphrodisiacs are widely consumed, little to  
447 no reliable information seems to exist about their pharmacological or toxicological properties  
448 for humans subjects. None of the plants reportedly used as aphrodisiacs in the present study  
449 are mentioned in a review of "scientifically proven herbal aphrodisiacs"<sup>1</sup>.

450

451 **Comparisons between men consuming aphrodisiacs and men not consuming**  
452 **aphrodisiacs**

453 We did not find differences between the two groups regarding serum levels of sex hormones.  
454 We also did not pick up complaints of adverse effects, such as priapism, during our survey.  
455 Total cholesterol and low-density lipoprotein were significantly higher among aphrodisiacs  
456 consumers than among non-consumers. We do not have explanations for these results but the  
457 higher prevalence of tobacco smoking found among our aphrodisiacs consumers could  
458 explain high lipid levels, since tobacco smoking is known to play a role in the occurrence of  
459 dyslipidemia [33,34]. Hypertension also appeared to be more prevalent among regular users  
460 of aphrodisiacs, possibly also in relation to smoking.

461 It is known that plants containing pyrrolizidine alkaloids may cause hepatic veno-occlusive  
462 disease [35] and acute renal failure is a common complication in poisoning by plants or  
463 mushrooms [35]. However, serum markers did not reveal hepatotoxicity or nephrotoxicity  
464 among consumers compared to non-consumers. Admittedly, our cross-sectional study was  
465 insensitive to document hepatotoxicity or nephrotoxicity among these relatively young and  
466 active men. We also did not detect significant differences among the different aphrodisiac  
467 agents used, although the numbers of subjects were low for some compounds. Another  
468 limitation is that we did not attempt to evaluate the quantities of aphrodisiacs taken by the  
469 participants. Studies should be conducted with designs allowing comparisons of effects within  
470 individuals, i.e., before and after consuming well defined compounds of interest.

471 **Reasons for consuming aphrodisiacs as emerging from our qualitative study**

472 Based on the rapid saturation achieved in the information obtained from the interviews, we  
473 may conclude that perceptions about masculinity were largely similar for miners and taxi-  
474 drivers.

475 However, the themes that emerged as reasons for taking aphrodisiacs differed between the  
476 two groups: taxi-drivers resorted to aphrodisiacs mainly for preventive purposes, as illustrated  
477 by the following quote from a taxi-driver:

478 *“When we take them regularly we feel like the hip becomes more flexible. This is why we trust*  
479 *all these herbal teas that these women sellers bring us because they help us prevent the worst*  
480 *in our couples” (T2)*

481 In contrast, miners took aphrodisiacs as a treatment to support failing erections, as evoked by  
482 one miner:

483 *“I haven't been able to make love for almost 3 years without using tonics and especially*  
484 *because I'm afraid that my wife will leave me because we're all still young” (M6)*

485 In Congolese cultures, there is a wide belief that a man must be dominant and possessive: men  
486 need to satisfy sexually women through penetrative sex regardless of his age, his mental state  
487 or his medical condition. Being a man implies maintaining one's erection long enough for  
488 penovaginal sex, and failure could result in masculinity loss, and/or infidelity of the wife.  
489 Men's ejaculation is an indicator of orgasm. Early ejaculation is an indicator of sexual  
490 dysfunction. Different Swahili expressions commonly used like: *Ule ni mwenye kufa tshini*  
491 (that one is dead down) to mean someone who is weak sexually; *Ule ni djogo* (that one is a  
492 rooster) to mean someone who ejaculates early; *Ule eko na ka bamiya* (that one has okra) to  
493 mean someone who has a small penis (like the legume).

494 The aforementioned cultural beliefs and considerations in Congo, as in most African  
495 countries, could play an important role in the widespread use of aphrodisiacs, and also  
496 contribute to a continuous search of an “ultimate” aphrodisiac for a perfect sexual life and a  
497 good reputation as a “real man” in society.

498 Our qualitative study was limited by the relatively low number of participants (even though  
499 we achieved saturation of the information), but we recognize that we could have obtained  
500 additional relevant information on the men's motivations to consume aphrodisiacs if we had  
501 included non-users (with and without complaints of ED), as well as traditional healers  
502 advising or producing aphrodisiacs, or sellers of these products. More importantly, we  
503 acknowledge a major limitation in that our study did not involve women, wives and other  
504 partners of miners and taxi-drivers. This will be done in future studies.

## 505 **Conclusions**

506 In a male worker population with high prevalence rates of reported ED, we found a high  
507 prevalence of regular consumption of various plant products used as natural aphrodisiacs. The  
508 widespread use of these herbal remedies is based on cultural beliefs about masculinity and  
509 male sexuality but the reasons for resorting to them appeared to differ between miners, who  
510 needed products to support failing erection, and taxi-drivers, who wanted them to prevent  
511 sexual problems. We found no evidence of nephrotoxicity, hepatotoxicity or hormonal



512 disturbances in men using these compounds. Nevertheless, more ethnobotanical studies of  
513 plants consumed as aphrodisiacs, focussing on isolation and rigorous identification of the  
514 active constituents, are needed to provide the poor population in DRC, and globally, with  
515 correct information to protect them against possible toxic effects of traditional ‘remedies’  
516 intended to improve or protect sexual function.

517 **Acknowledgments:** We thank the participants for their participation, and their  
518 representatives, as well as local authorities, for facilitating or allowing this study.

519 **Competing interest:** The authors declare they don’t have conflicts of interest.

520 The data for this study will be made available upon reasonable request from the  
521 corresponding author.

522 **Author contributions:** PMO, PE and BN conceived and designed the study. CLBN  
523 supervised the field study. PMO, GKM, JPK, TCK and TMM collected data in mining and  
524 among taxi-drivers. PMO cleaned and analysed the data under supervision of PE and BN.  
525 PMO wrote successive drafts of the paper, with input from JPK, TCK, GKM and TKK under  
526 the supervision of PE and BN. All authors approved the final version of the manuscript.

527

528

529 **References**

- 530 [1] Srivatsav A, Balasubramanian A, Pathak UI, et al. Efficacy and Safety of Common  
531 Ingredients in Aphrodisiacs Used for Erectile Dysfunction: A Review. *Sex Med Rev.*  
532 2020;8:431–442.
- 533 [2] Ali J, Ansari S, Kotta S. Exploring scientifically proven herbal aphrodisiacs. *Phcog*  
534 *Rev.* 2013;7:1.
- 535 [3] Rajender S. Potent natural aphrodisiacs for the management of erectile dysfunction and  
536 male sexual debilities. *Front Biosci.* 2012;S4:167–180.
- 537 [4] Corona G, Rastrelli G, Burri A, et al. The safety and efficacy of Avanafil, a new 2<sup>nd</sup>  
538 generation PDE5i: comprehensive review and meta-analysis. *Expert Opinion on Drug*  
539 *Safety.* 2016;15:237–247.
- 540 [5] Mutombo PN, Kasilo OMJ, James PB, et al. Experiences and challenges of African  
541 traditional medicine: lessons from COVID-19 pandemic. *BMJ Glob Health.*  
542 2023;8:e010813.
- 543 [6] [https://www.afro.who.int/news/who-calls-african-governments-formally-recognize-](https://www.afro.who.int/news/who-calls-african-governments-formally-recognize-traditional-medicine)  
544 [traditional-medicine.](https://www.afro.who.int/news/who-calls-african-governments-formally-recognize-traditional-medicine)
- 545 [7] Mutombo CS, Bakari SA, Ntabaza VN, et al. Perceptions and use of traditional African  
546 medicine in Lubumbashi, Haut-Katanga province (DR Congo): A cross-sectional study.  
547 Mordaunt DA, editor. *PLoS ONE.* 2022;17:e0276325.
- 548 [8] Mbanga AM, Assumani ZI, Kalima RM, et al. Ethnobotanical survey of plants used  
549 against erectile dysfunction in the commune of Ngaba in Kinshasa / DR Congo. *World*  
550 *J Adv Res Rev.* 2022;13:193–200.
- 551 [9] Bashige CV, Alombong AG, Kamwimba MA, et al. Ethnobotanical study of medicinal  
552 plants used in the treatment of sexual dysfunctions in traditional medicine in  
553 Kampemba-Lubumbashi, DR Congo. *World J Adv Res Rev.* 2020;7:016–032.
- 554 [10] Musa Obadia P, Pyana Kitenge J, Carsi Kuhangana T, et al. Erectile dysfunction in  
555 copper and cobalt miners: a cross-sectional study in the former Katanga province,  
556 Democratic Republic of the Congo. *Sex Med.* 2023;11:qfad052.
- 557 [11] Halcomb E, Hickman L. Mixed methods research. *Nursing Standard.* 2015;29:41–47.
- 558 [12] Palinkas LA, Mendon SJ, Hamilton AB. Innovations in Mixed Methods Evaluations.  
559 *Annu Rev Public Health.* 2019;40:423–442.
- 560 [13] Musa Obadia P, Pyana Kitenge J, Carsi Kuhangana T, Verpaele S, Ndala Nyongonyi  
561 A, Kayembe Kitenge T, Katoto PDM, Banza CLN, Nemery B. Hypoxemia and risk of  
562 asphyxia during underground work in artisanal cobalt mines. *Occupational Medicine*  
563 (Oxford), 2024, in press.
- 564 [14] Rosen RC, Riley A, Wagner G, et al. The international index of erectile function  
565 (IIEF): a multidimensional scale for assessment of erectile dysfunction. *Urology.*  
566 1997;49:822–830.

- 567 [15] Van Kollenburg RAA, De Bruin DM, Wijkstra H. Validation of the Electronic Version  
568 of the International Index of Erectile Function (IIEF-5 and IIEF-15): A Crossover  
569 Study. *J Med Internet Res.* 2019;21:e13490.
- 570 [16] Vermeulen A, Verdonck L, Kaufman JM. A critical evaluation of simple methods for  
571 the estimation of free testosterone in serum. *J Clin Endocrinol Metab.* 1999;84:3666–  
572 3672.
- 573 [17] Kiger ME, Varpio L. Thematic analysis of qualitative data: AMEE Guide No. 131.  
574 *Medical Teacher.* 2020;42:846–854.
- 575 [18] Manortey S, Mensah PA, Acheampong GK. Evaluating Factors Associated with the  
576 Use of Aphrodisiacs among Adult Male Residents in Ashaiman Municipality, Ghana.  
577 *OALib.* 2018;05:1–13.
- 578 [19] Ndombe DM, Muleka IB, F. Manun'Ebo M. Consommation Des Aphrodisiaques Chez  
579 Les adolescents Et Adultes À Kinshasa : Prévalence Et Facteurs Associés. *ESJ*  
580 [Internet]. 2022 [cited 2023 Aug 30];18. Available from:  
581 <https://eujournal.org/index.php/esj/article/view/15512>.
- 582 [20] Amoah PA, Adjei SB, Arthur-Holmes F. A Social–Ecological Study of Perceptions and  
583 Determinants of Sexual Enhancement Drug Use among Men and Women in Ghana. *Int.*  
584 *J. Environ. Res. Public Health.* 2022;19:6521.
- 585 [21] Carsi Kuhangana T, Muta Musambo T, Pyana Kitenge J, et al. Energy Drink  
586 Consumption among Adolescents Attending Schools in Lubumbashi, Democratic  
587 Republic of Congo. *Int. J. Environ. Res. Public Health.* 2021;18:7617.
- 588 [22] Kathryn S. K. H, Yitzchak M. B. *Principles and Practice of Sex Therapy.* 6th ed. New  
589 york: The Guilford Press; 2020.
- 590 [23] Grover S, Mattoo SK, Pendharkar S, et al. Sexual Dysfunction in Patients with Alcohol  
591 and Opioid Dependence. *Indian Journal of Psychological Medicine.* 2014;36:355–365.
- 592 [24] Ajao AA, Sibiya NP, Moteetee AN. Sexual prowess from nature: A systematic review  
593 of medicinal plants used as aphrodisiacs and sexual dysfunction in sub-Saharan Africa.  
594 *South African Journal of Botany.* 2019;122:342–359.
- 595 [25] Riaz F, Khan UA, Ayub M, Shaukat S. Protective role of ginger on lead induced  
596 derangement in plasma testosterone and luteinizing hormone levels of male Sprague  
597 Dawley rats . *J Ayub Med Coll Abbottabad.* 2011;23(4):24-27.
- 598 [26] Afzali A, Ghalehkandi JG. Effect of ginger, *Zingiber officinale* on sex hormones and  
599 certain biochemical parameters of male Wistar rats. *Biosci Biotech Res Comm.*  
600 2018;11:181–186.
- 601 [27] Banihani SA. Ginger and Testosterone. *Biomolecules.* 2018;8:119.
- 602 [28] Ogbunugafor H, A OV, I OJ, et al. *Mitragyna ciliata* and its trypanocidal activity. *Afr J*  
603 *Biotechnol.* 2007;6:2310–2313.

- 604 [29] Bidié AP, Yapo FA, Yéo D, et al. Effet de *Mitragyna ciliata* (MYTA) sur le système  
605 cardiovasculaire de rat. *Phytothérapie*. 2010;8:3–8.
- 606 [30] Malaisse F, Schaijes M. Copper-Cobalt Flora of upper Katanga and copperbelt. *Presse*  
607 *agronomiques de Gembloux*. Gembloux, Belgique; 2016.
- 608 [31] Kanedi SM, Rosa E. Effects of Black Pepper (*Piper nigrum* Linn.) Extract on Sexual  
609 Drive in Male Mice. *Research J of Medicinal Plant*. 2015;9:42–47.
- 610 [32] Rakuambo NC, Meyer JJM, Hussein A, et al. In vitro effect of medicinal plants used to  
611 treat erectile dysfunction on smooth muscle relaxation and human sperm. *Journal of*  
612 *Ethnopharmacology*. 2006;105:84–88.
- 613 [33] Gossett LK, Johnson HM, Piper ME, et al. Smoking intensity and lipoprotein  
614 abnormalities in active smokers. *Journal of Clinical Lipidology*. 2009;3:372–378.
- 615 [34] Shearman AM, Demissie S, Cupples LA, et al. Tobacco smoking, estrogen receptor  $\alpha$   
616 gene variation and small low density lipoprotein level. *Human Molecular Genetics*.  
617 2005;14:2405–2413.
- 618 [35] Curtis D.K. *Toxicology: the basic science of poisons*. 7th edition. Casarett and Doull's;  
619 2008.
- 620

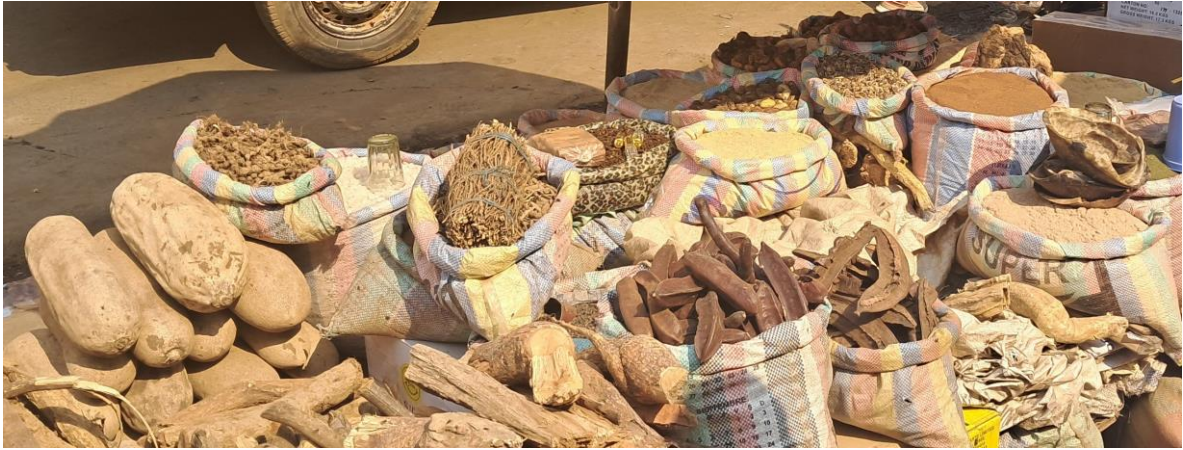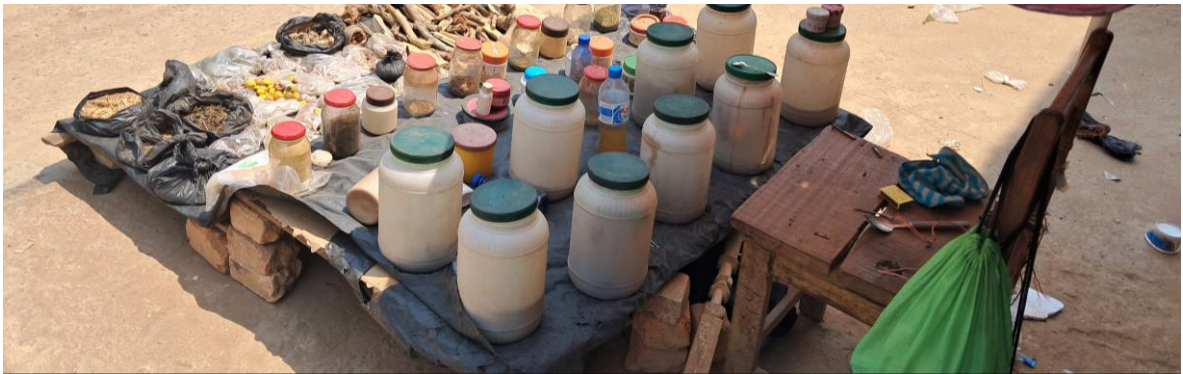

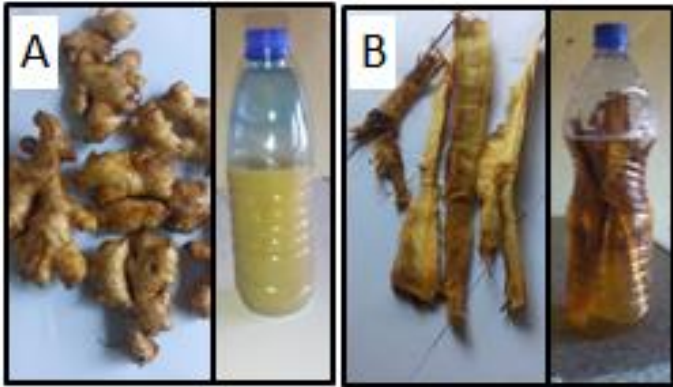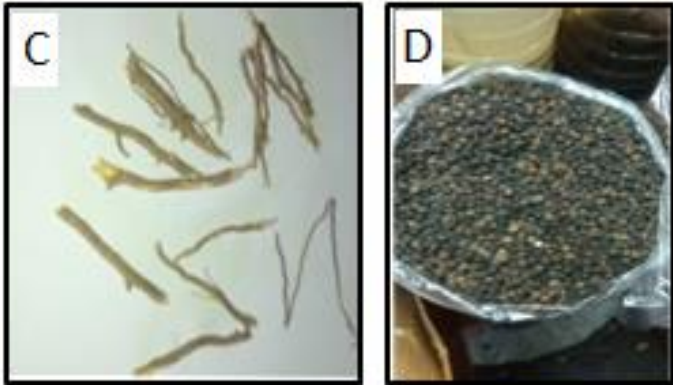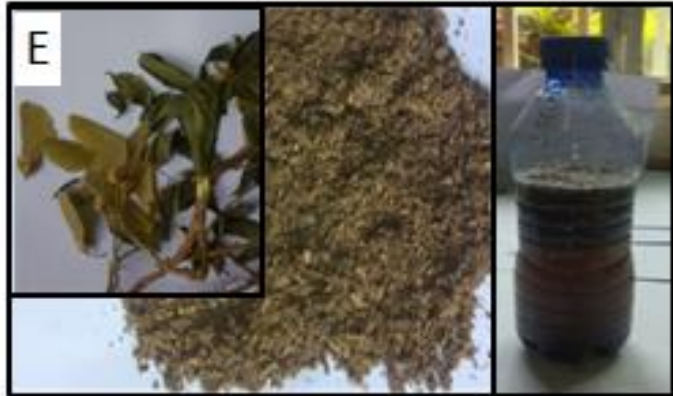

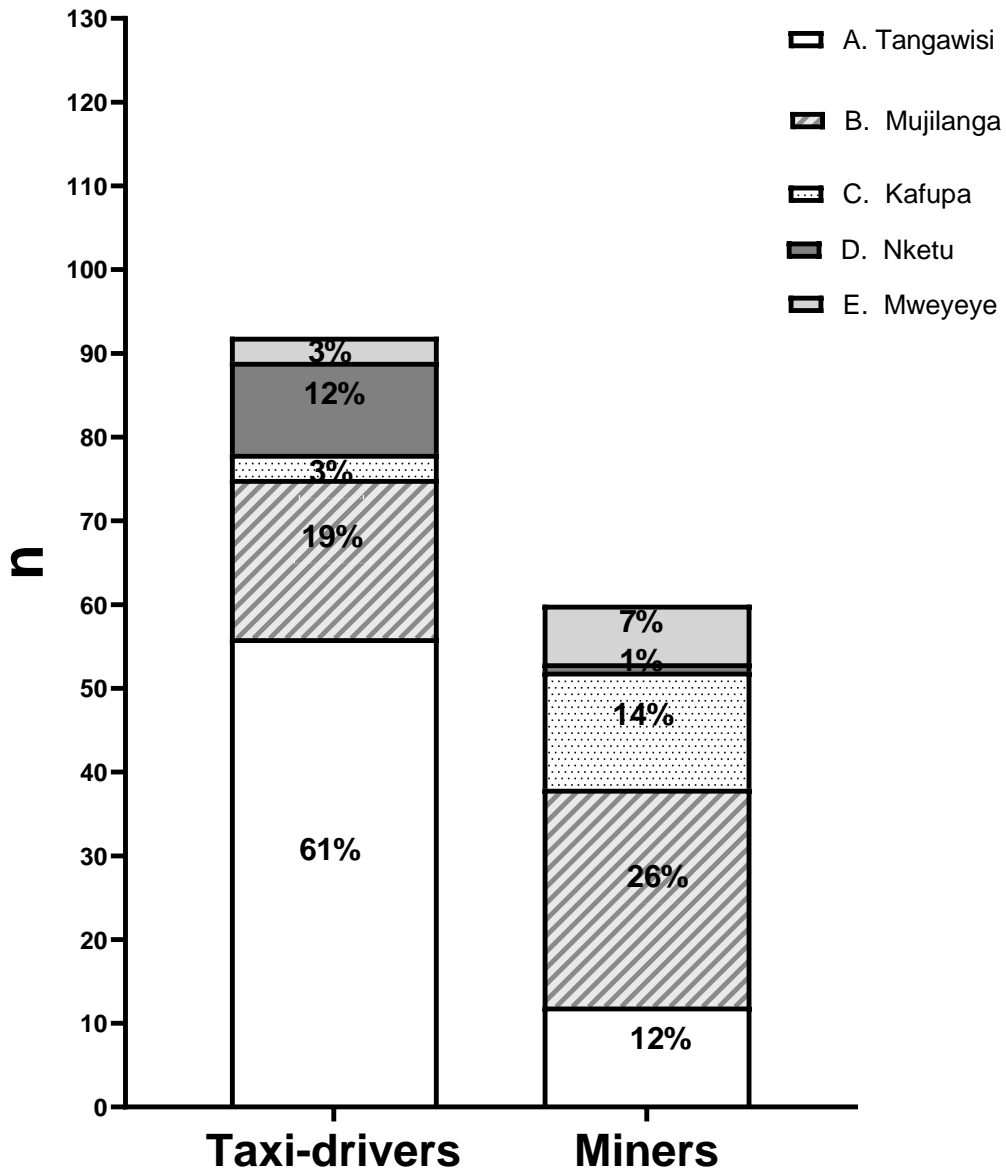

Source: https://www.medrxiv.org/content/10.1101/2024.02.07.24302074v1.full.pdf
